# Supplementary material for: A performance assessment of web-based respondent driven sampling among workers with precarious employment in Sweden
Source: PubMed Central journal article supplement (PMC6328181; doi:10.1371/journal.pone.0210183), 2019-01-10
Supplement: pone.0210183.s001.pdf [file pone.0210183.s001.pdf]

**S1 Table. Recruitment homophily estimates for eligible recruits and eligible and ineligible recruits**

|                        | Eligible recruits<br>(n=358) | Eligible plus ineligible recruits<br>(n=426) |
|------------------------|------------------------------|----------------------------------------------|
| Sex                    | 1.34                         | 1.36                                         |
| Age                    | 1.65                         | 1.68                                         |
| Employment type        | 1.45                         | 1.42                                         |
| Income                 | 1.27                         | 1.23                                         |
| Average hours per week | 1.35                         | 1.32                                         |
